# Supplementary material
Source: Research Square preprint supplement (doi:10.21203/rs.3.rs-8739415/v1)
Supplement: Supplementary file 1 [file fef99944c2af68837a96721f.xlsx]

## Sheet: Sheet1
Table S1 The detection of amino acids
Item	Group		P-value
	NHS	HS
γGABA（ng/mL）	11905.46 ± 5746.28	93344.09 ± 17173.65	<0.01
Phe（nmol/ml）	105.21 ± 29.24	850.59 ±104.80	<0.001
Leu（nmol/ml）	202.71 ±58.98	1678.32 ±234.98	<0.01
Trp（ng/mL）	180.81 ±21.20	815.44 ±119.01	<0.01
ILe（nmol/ml）	456.52 ±46.34	1073.53 ±79.34	<0.001
Met（nmol/ml）	53.67 ±18.64	423.77 ±64.15	<0.01
Tyr（nmol/ml）	75.44 ±25.28	608.32 ±46.42	<0.001
Val（nmol/ml）	182.36 ± 55.69	990.09 ±43.49	<0.001
Pro（nmol/ml）	97.67 ±27.81	546.15 ±61.54	<0.001
Ala（nmol/ml）	3740.57 ±1363.81	18391.06 ±1146.99	<0.001
Thr（nmol/ml）	309.34 ±62.81	1419.11 ±118.51	<0.001
SAH（ng/mL）	21.25 ±1.13	200.33 ±38.85	<0.01
Gly（nmol/ml）	1378.84 ± 444.24	6547.76 ±1083.94	<0.01
Gln（ng/mL）	12022.20 ±4664.13	98491.21 ±7121.47	<0.001
Ser（nmol/ml）	349.66 ±181.63	2835.06 ±324.68	<0.001
Asn（ng/mL）	75.61 ±22.64	431.74 ±74.34	<0.01
Glu（nmol/ml）	2227.62 ±861.48	14727.14 ±2290.25	<0.01
Asp（ng/mL）	1563.83 ±436.18	8778.79 ±1305.62	<0.01
His（nmol/ml）	72.76 ± 26.78	659.95 ±89.98	<0.001
Cys（nmol/ml）	289.56 ±93.79	1497.04 ±183.86	<0.01
Arg（nmol/ml）	556.90 ±112.37	2038.16 ±187.56	<0.001
SAM（ng/ml）	42.38 ±23.24	532.45 ±48.02	<0.001
Lys（nmol/ml）	283.17 ±121.67	1560.40 ±127.40	<0.001
